# Supplementary material
Source: PubMed Central journal article supplement (PMC4878895)

## Entorhinal cortex right

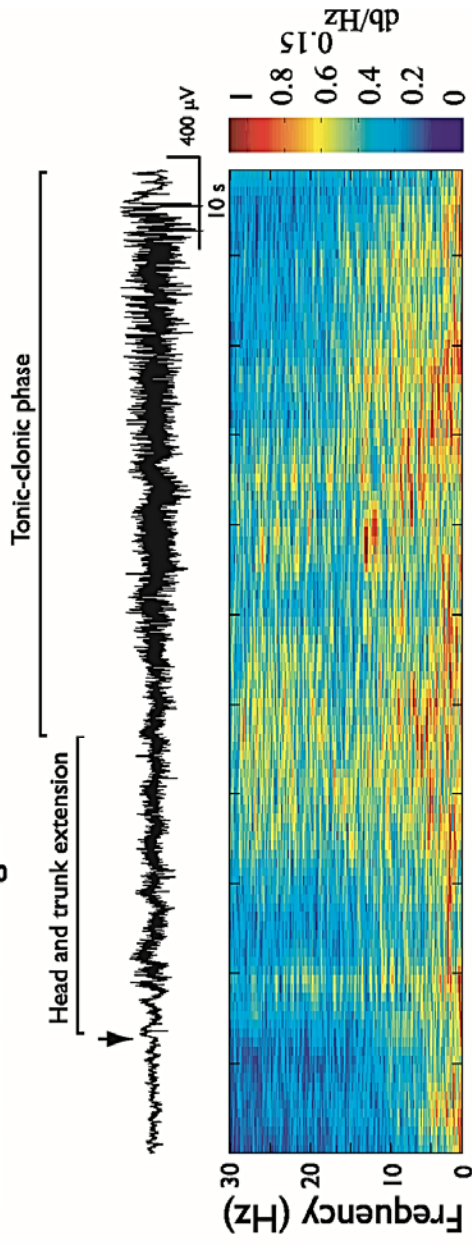

## CA3 right

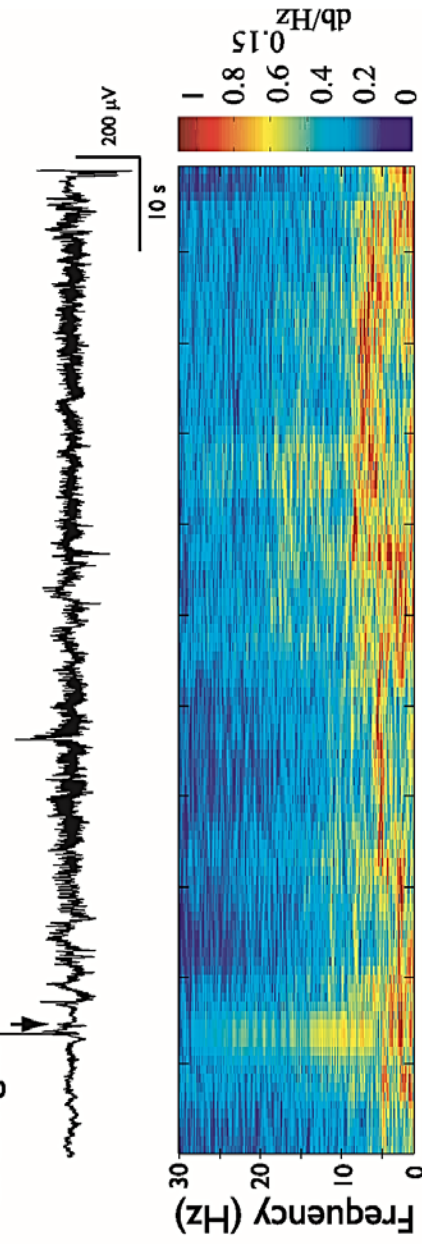

## Subiculum left

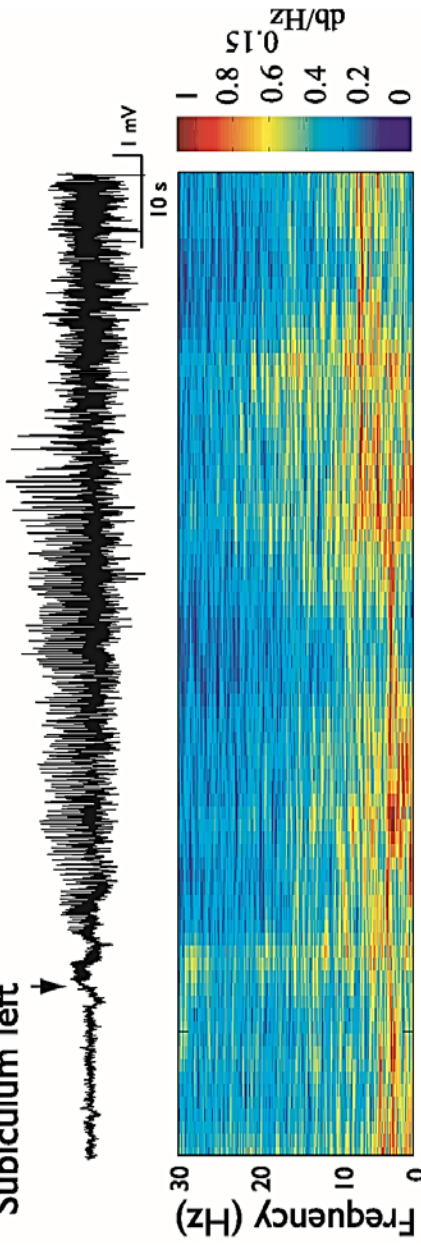

## Neocortex right

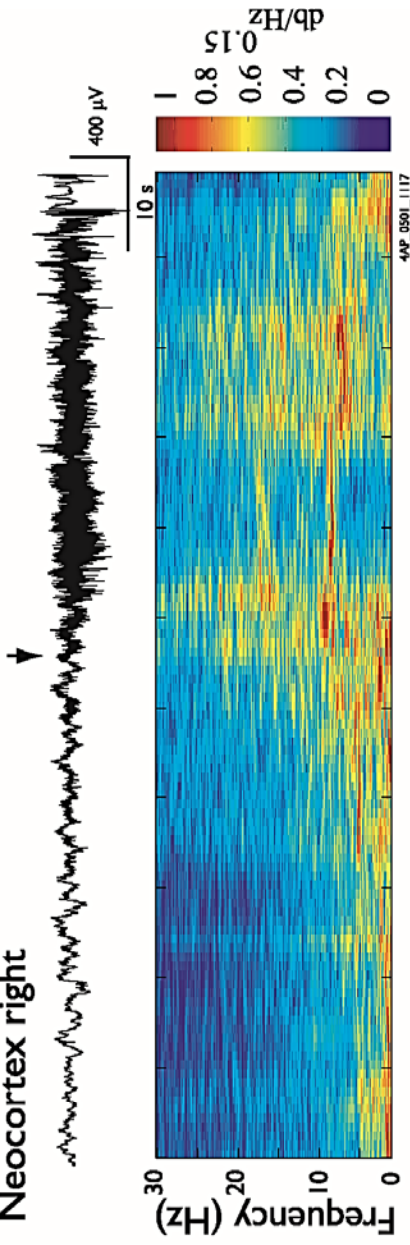

Supplement: NIHMS5650-supplement-Supplementary_Figure_1.pdf [file NIHMS5650-supplement-Supplementary_Figure_1.pdf]
